# Supplementary material for: Fluorescence properties of organic dyes: quantum chemical studies on the green/blue neutral and protonated DMA-DPH emitters in polymer matrices
Source: Royal Society of Chemistry journal article supplement (doi:10.1039/c1cp22499a), 2011-01-01
Supplement: c1cp22499a.pdf [file c1cp22499a.pdf]

## Fluorescence properties of organic dyes: Quantum chemical studies on the green/blue neutral and protonated DMA-DPH emitters in polymer matrices

Ioannis S. K. Kerkines,<sup>\*a</sup> Ioannis D. Petsalakis,<sup>a</sup> Panagiotis Argitis,<sup>b</sup> and Giannoula Theodorakopoulos<sup>\*a</sup>

### Supplementary Information

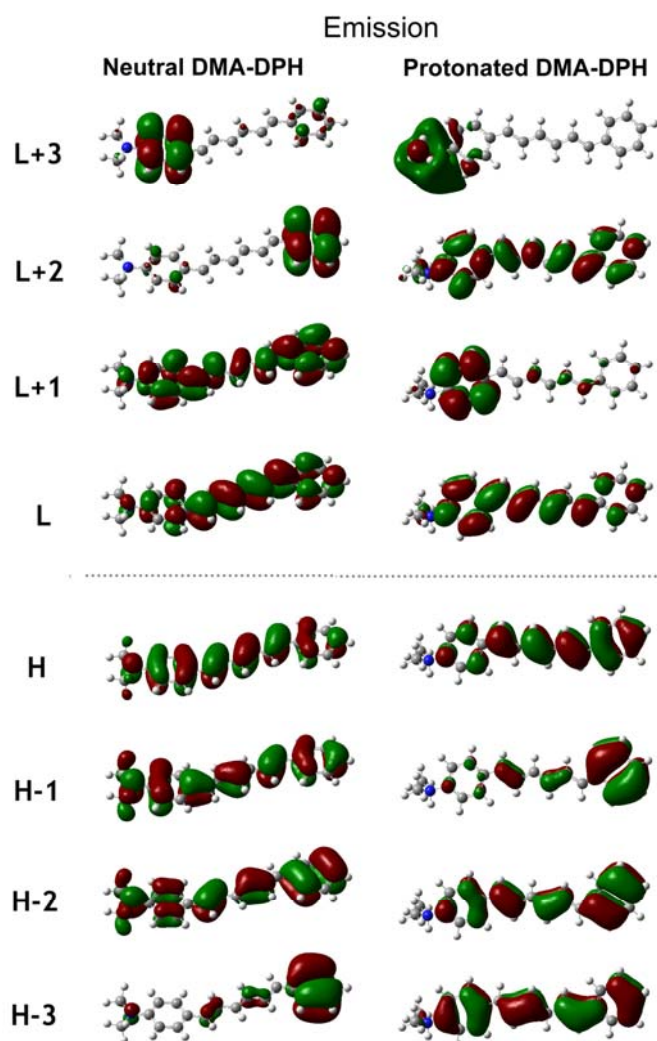

**Figure S1** Highest occupied (H, H-1, H-2, H-3) and lowest unoccupied (L, L+1, L+2, L+3) orbitals at the CAM-B3LYP/6-311G(d,p) level for DMA-DPH<sub>n</sub> and DMA-DPH<sub>p</sub> at their emission geometries..

**Table S1.** Low-lying absorption energies  $\Delta E$ (eV), wavelengths  $\lambda$ (nm) and relevant oscillator strengths  $f$  for the ( $S_2, S_3, S_4, S_5$ )  $\leftarrow S_0$  excitations of DMA-DPH<sub>n</sub> in gas phase and in various solvents at different levels of theory. See text for description of the methods.

| Level                       | $S_2 \leftarrow S_0$ |              | $S_3 \leftarrow S_0$ |              | $S_4 \leftarrow S_0$ |              | $S_5 \leftarrow S_0$ |              |
|-----------------------------|----------------------|--------------|----------------------|--------------|----------------------|--------------|----------------------|--------------|
|                             | $\Delta E$           | $\lambda(f)$ |
| <u>Gas phase</u>            |                      |              |                      |              |                      |              |                      |              |
| TD-B3LYP/6-311G(d,p)        | 3.711                | 334.1(0.28)  | 3.997                | 310.2(0.08)  | 4.114                | 301.4(0.01)  | 4.322                | 286.9(0.00)  |
| TD-B3LYP/TZVPP              | 3.687                | 336.3(0.23)  | 3.917                | 316.5(0.11)  | 4.033                | 307.5(0.02)  | 4.286                | 289.3(0.00)  |
| TD-CAM-B3LYP/6-311G(d,p)    | 4.497                | 275.7(0.07)  | 4.696                | 264.0(0.02)  | 4.915                | 252.2(0.04)  | 5.035                | 246.2(0.02)  |
| TD-CAM-B3LYP/TZVPP          | 4.396                | 282.1(0.08)  | 4.654                | 266.4(0.01)  | 4.844                | 255.9(0.06)  | 4.986                | 248.7(0.02)  |
| RICC2/def2-SVP              | 4.318                | 287.1(0.07)  | 4.596                | 269.8(0.27)  |                      |              |                      |              |
| RICC2/TZVPP                 | 4.149                | 298.8(0.08)  | 4.421                | 280.4(0.18)  |                      |              |                      |              |
| <u>Benzene</u>              |                      |              |                      |              |                      |              |                      |              |
| LR-TD-B3LYP/6-311G(d,p)     | 3.647                | 339.9(0.28)  | 3.941                | 314.6(0.05)  | 4.055                | 305.7(0.04)  | 4.207                | 294.7(0.00)  |
| LR-TD-CAM-B3LYP/6-311G(d,p) | 4.408                | 281.3(0.10)  | 4.545                | 272.8(0.01)  | 4.895                | 253.3(0.05)  | 4.989                | 248.5(0.02)  |
| <u>Hexane</u>               |                      |              |                      |              |                      |              |                      |              |
| LR-TD-B3LYP/6-311G(d,p)     | 3.663                | 338.4(0.27)  | 3.962                | 313.0(0.05)  | 4.075                | 304.3(0.03)  | 4.233                | 292.9(0.00)  |
| LR-TD-CAM-B3LYP/6-311G(d,p) | 4.441                | 279.2(0.09)  | 4.581                | 270.6(0.01)  | 4.903                | 252.9(0.04)  | 5.001                | 247.9(0.02)  |
| <u>Diethylether</u>         |                      |              |                      |              |                      |              |                      |              |
| LR-TD-B3LYP/6-311G(d,p)     | 3.647                | 340.0(0.31)  | 3.953                | 313.6(0.05)  | 4.056                | 305.7(0.03)  | 4.216                | 294.0(0.00)  |
| LR-TD-CAM-B3LYP/6-311G(d,p) | 4.426                | 280.1(0.10)  | 4.566                | 271.5(0.01)  | 4.898                | 253.2(0.05)  | 4.993                | 248.3(0.02)  |
| <u>Methyl Propanoate</u>    |                      |              |                      |              |                      |              |                      |              |
| LR-TD-B3LYP/6-311G(d,p)     | 3.640                | 340.6(0.32)  | 3.948                | 314.1(0.05)  | 4.049                | 306.2(0.04)  | 4.208                | 294.6(0.00)  |
| SS-TD-B3LYP/6-311G(d,p)     |                      |              |                      |              |                      |              |                      |              |
| LR-TD-B3LYP/TZVPP           | 3.622                | 342.3(0.28)  | 3.862                | 321.0(0.06)  | 3.968                | 312.5(0.05)  | 4.170                | 297.4(0.00)  |
| LR-TD-CAM-B3LYP/6-311G(d,p) | 4.418                | 280.6(0.10)  | 4.556                | 272.1(0.02)  | 4.895                | 253.3(0.05)  | 4.989                | 248.5(0.02)  |
| SS-TD-CAM-B3LYP/6-311G(d,p) |                      |              |                      |              |                      |              |                      |              |
| LR-TD-CAM-B3LYP/TZVPP       | 4.320                | 287.0(0.10)  | 4.513                | 274.8(0.01)  | 4.821                | 257.2(0.07)  | 4.942                | 250.9(0.02)  |
| <u>Acetone</u>              |                      |              |                      |              |                      |              |                      |              |
| LR-TD-B3LYP/6-311G(d,p)     | 3.632                | 341.4(0.34)  | 3.942                | 314.5(0.05)  | 4.040                | 306.9(0.04)  | 4.200                | 295.2(0.00)  |
| LR-TD-B3LYP/TZVPP           | 3.613                | 343.2(0.30)  | 3.857                | 321.5(0.06)  | 3.958                | 313.2(0.05)  | 4.162                | 297.9(0.00)  |
| LR-TD-CAM-B3LYP/6-311G(d,p) | 4.410                | 281.1(0.10)  | 4.550                | 272.5(0.01)  | 4.892                | 253.4(0.06)  | 4.985                | 248.7(0.02)  |
| LR-TD-CAM-B3LYP/TZVPP       | 4.312                | 287.5(0.10)  | 4.507                | 275.1(0.01)  | 4.818                | 257.3(0.07)  | 4.938                | 251.1(0.02)  |
| <u>Acetonitrile</u>         |                      |              |                      |              |                      |              |                      |              |
| LR-TD-B3LYP/6-311G(d,p)     | 3.559                | 348.3(0.25)  | 3.841                | 322.8(0.03)  | 3.998                | 310.1(0.09)  | 4.109                | 301.8(0.00)  |
| LR-TD-B3LYP/TZVPP           | 3.547                | 349.6(0.23)  | 3.751                | 330.5(0.03)  | 3.920                | 316.3(0.10)  | 4.057                | 305.6(0.01)  |
| LR-TD-CAM-B3LYP/6-311G(d,p) | 4.250                | 291.7(0.10)  | 4.416                | 280.8(0.04)  | 4.870                | 254.6(0.07)  | 4.955                | 250.2(0.02)  |
| LR-TD-CAM-B3LYP/TZVPP       | 4.170                | 297.3(0.12)  | 4.345                | 285.3(0.03)  | 4.796                | 258.5(0.08)  | 4.906                | 252.8(0.02)  |

**Table S2.** Low-lying absorption energies  $\Delta E$ (eV), wavelengths  $\lambda$ (nm) and relevant oscillator strengths  $f$  for the ( $S_2, S_3, S_4, S_5$ )  $\leftarrow S_0$  excitations of DMA-DPH\_p in gas phase and in various solvents at different levels of theory. See text for description of the methods.

| Level                       | $S_2 \leftarrow S_0$ |              | $S_3 \leftarrow S_0$ |              | $S_4 \leftarrow S_0$ |              | $S_5 \leftarrow S_0$ |              |
|-----------------------------|----------------------|--------------|----------------------|--------------|----------------------|--------------|----------------------|--------------|
|                             | $\Delta E$           | $\lambda(f)$ |
| <u>Gas phase</u>            |                      |              |                      |              |                      |              |                      |              |
| TD-B3LYP/6-311G(d,p)        | 3.181                | 389.8(0.12)  | 3.518                | 352.4(0.01)  | 3.548                | 349.4(0.00)  | 3.814                | 325.1(0.45)  |
| TD-B3LYP/TZVPP              | 3.128                | 396.4(0.16)  | 3.493                | 354.9(0.00)  | 3.533                | 350.9(0.01)  | 3.803                | 326.1(0.44)  |
| TD-CAM-B3LYP/6-311G(d,p)    | 4.157                | 298.2(0.07)  | 4.650                | 266.6(0.01)  | 4.756                | 260.7(0.02)  | 4.880                | 254.1(0.23)  |
| TD-CAM-B3LYP/TZVPP          | 4.075                | 304.3(0.09)  | 4.640                | 267.2(0.02)  | 4.708                | 263.3(0.03)  | 4.864                | 254.9(0.19)  |
| RICC2/def2-SVP              | 4.114                | 301.3(0.06)  | 4.478                | 276.8(0.01)  |                      |              |                      |              |
| RICC2/TZVPP                 | 3.871                | 320.3(0.10)  | 4.369                | 283.8(0.02)  |                      |              |                      |              |
| <u>Benzene</u>              |                      |              |                      |              |                      |              |                      |              |
| LR-TD-B3LYP/6-311G(d,p)     | 3.561                | 348.2(0.08)  | 3.884                | 319.2(0.16)  | 3.915                | 316.7(0.08)  | 4.280                | 289.7(0.00)  |
| LR-TD-CAM-B3LYP/6-311G(d,p) | 4.518                | 274.4(0.06)  | 4.770                | 259.9(0.00)  | 4.872                | 254.5(0.01)  | 5.051                | 245.5(0.10)  |
| <u>Hexane</u>               |                      |              |                      |              |                      |              |                      |              |
| LR-TD-B3LYP/6-311G(d,p)     | 3.486                | 355.7(0.08)  | 3.828                | 323.8(0.04)  | 3.888                | 318.8(0.26)  | 4.272                | 290.2(0.01)  |
| LR-TD-CAM-B3LYP/6-311G(d,p) | 4.460                | 278.0(0.06)  | 4.767                | 260.1(0.01)  | 4.843                | 256.0(0.01)  | 5.026                | 246.7(0.12)  |
| <u>Diethylether</u>         |                      |              |                      |              |                      |              |                      |              |
| LR-TD-B3LYP/6-311G(d,p)     | 3.743                | 331.3(0.09)  | 3.929                | 315.6(0.11)  | 4.063                | 305.2(0.01)  | 4.289                | 289.1(0.00)  |
| LR-TD-CAM-B3LYP/6-311G(d,p) | 4.615                | 268.7(0.04)  | 4.794                | 258.6(0.01)  | 4.922                | 251.9(0.01)  | 5.100                | 243.1(0.05)  |
| <u>Methyl Propanoate</u>    |                      |              |                      |              |                      |              |                      |              |
| LR-TD-B3LYP/6-311G(d,p)     | 3.805                | 325.8(0.10)  | 3.948                | 314.1(0.06)  | 4.116                | 301.2(0.01)  | 4.286                | 289.3(0.00)  |
| LR-TD-B3LYP/TZVPP           | 3.753                | 330.4(0.10)  | 3.929                | 315.5(0.05)  | 4.122                | 300.8(0.01)  | 4.253                | 291.5(0.00)  |
| LR-TD-CAM-B3LYP/6-311G(d,p) | 4.628                | 267.9(0.02)  | 4.814                | 257.5(0.01)  | 4.935                | 251.2(0.00)  | 5.114                | 242.5(0.04)  |
| LR-TD-CAM-B3LYP/TZVPP       | 4.550                | 272.5(0.03)  | 4.759                | 260.5(0.02)  | 4.897                | 253.2(0.00)  | 5.094                | 243.4(0.03)  |
| <u>Acetone</u>              |                      |              |                      |              |                      |              |                      |              |
| LR-TD-B3LYP/6-311G(d,p)     | 3.881                | 319.5(0.09)  | 4.008                | 309.3(0.00)  | 4.195                | 295.5(0.01)  | 4.272                | 290.2(0.00)  |
| LR-TD-B3LYP/TZVPP           | 3.835                | 323.3(0.08)  | 3.982                | 311.4(0.00)  | 4.190                | 295.9(0.00)  | 4.239                | 292.5(0.01)  |
| LR-TD-CAM-B3LYP/6-311G(d,p) | 4.615                | 268.6(0.01)  | 4.856                | 255.3(0.02)  | 4.497                | 250.6(0.00)  | 5.123                | 241.8(0.02)  |
| LR-TD-CAM-B3LYP/TZVPP       | 4.542                | 273.0(0.01)  | 4.800                | 258.3(0.03)  | 4.904                | 252.8(0.00)  | 5.108                | 242.7(0.02)  |
| <u>Acetonitrile</u>         |                      |              |                      |              |                      |              |                      |              |
| LR-TD-B3LYP/6-311G(d,p)     | 3.888                | 318.9(0.08)  | 4.023                | 308.2(0.00)  | 4.206                | 294.8(0.01)  | 4.268                | 290.5(0.00)  |
| LR-TD-B3LYP/TZVPP           | 3.845                | 322.5(0.08)  | 3.996                | 310.3(0.00)  | 4.197                | 295.4(0.00)  | 4.238                | 292.6(0.01)  |
| LR-TD-CAM-B3LYP/6-311G(d,p) | 4.611                | 268.9(0.01)  | 4.864                | 254.9(0.02)  | 4.949                | 250.5(0.00)  | 5.131                | 241.6(0.02)  |
| LR-TD-CAM-B3LYP/TZVPP       | 4.538                | 273.2(0.01)  | 4.808                | 257.9(0.03)  | 4.905                | 252.8(0.00)  | 5.111                | 242.6(0.01)  |
